# Supplementary material
Source: PubMed Central journal article supplement (PMC7471344)
Supplement: ajcr0010-2480-f7.pdf [file ajcr0010-2480-f7.pdf]

## Role of the IGF2BP3/ELAVL1 complex in colorectal cancer

**Table S1.** Primers of clone, shRNA, qRT-PCR, RIP-qPCR used in this study

| Clone primers                    | Sequences                                                                                                                                                                                                                                                                                    |
|----------------------------------|----------------------------------------------------------------------------------------------------------------------------------------------------------------------------------------------------------------------------------------------------------------------------------------------|
| Flag-IGF2BP3-F                   | CGGAATTCGCCACCATGAACAACTGTATATCGGA                                                                                                                                                                                                                                                           |
| Flag-IGF2BP3-R                   | GCTCTAGATTACTTATCGTCGTCATCCTTGTAACTCCTCCGTCTTGACTGAGG                                                                                                                                                                                                                                        |
| IGF2BP3 deletion mutants primers | Sequences                                                                                                                                                                                                                                                                                    |
| KH1-4 F                          | CG GAATTC GCCACC ATGAACAACTGTATATCGGA                                                                                                                                                                                                                                                        |
| KH1-4 R                          | GCTCTAGA TTA CTTATCGTCGTCATCCTTGTAACT ACATGGTTTCTGCTTGATAC                                                                                                                                                                                                                                   |
| KH1-2                            | #1 F: CG GAATTC GCCACC ATGAACAACTGTATATCGGA<br>R: CCTGATTTTCTTCATACATGTTTCTGCTT<br>#2 F: AAGCAGAAACCATGT ATGAAGAAAATCAGG<br>R: GCTCTAGATTACTTATCGTCGTCATCCTTGTAACTCCTCCGTCTTGACTGAGG<br>#3 F: CGGAATTCGCCACCATGAACAACTGTATATCGGA<br>R: GCTCTAGATTACTTATCGTCGTCATCCTTGTAACTCCTCCGTCTTGACTGAGG |
| KH3-4 F                          | CG GAATTC GCCACC ATGAACAACTGTATATCGGA                                                                                                                                                                                                                                                        |
| KH3-4 R                          | GCTCTAGA TTA CTTATCGTCGTCATCCTTGTAACT TTCTGATTGCTCAAACCTGCGG                                                                                                                                                                                                                                 |
| ΔRRM F                           | CG GAATTC GCCACC GAAATGGCCGCCAGCAAAC                                                                                                                                                                                                                                                         |
| ΔRRM R                           | GCTCTAGA TTA CTTATCGTCGTCATCCTTGTAACT CTTCCGTCTTGACTGAGG                                                                                                                                                                                                                                     |
| shRNA primers                    | Sequences                                                                                                                                                                                                                                                                                    |
| IGF2BP3-shRNA1-F                 | GATCC CGGTGAATGAACTTCAGAATT CTTCTGTGCAGA AATTCTGAAGTTCATTCACCG TTTTGG                                                                                                                                                                                                                        |
| IGF2BP3-shRNA1-R                 | AATTCAAAAA CGGTGAATGAACTTCAGAATT TCTGACAGGAAG AATTCTGAAGTTCATTCACCG G                                                                                                                                                                                                                        |
| IGF2BP3-shRNA2-F                 | GATCC GAAACTTCAGATACGAAATAT CTTCTGTGCAGA ATATTTTCGTATCTGAAGTTTC TTTTGG                                                                                                                                                                                                                       |
| IGF2BP3-shRNA2-R                 | AATTCAAAAA GAAACTTCAGATACGAAATAT TCTGACAGGAAG ATATTTTCGTATCTGAAGTTTC G                                                                                                                                                                                                                       |
| IGF2BP3-shRNA3-F                 | GATCC TCTGCGGCTTGTAAAGTCTATT CTTCTGTGCAGA AATAGACTTACAAGCCGCAGA TTTTGG                                                                                                                                                                                                                       |
| IGF2BP3-shRNA3-R                 | AATTCAAAAA TCTGCGGCTTGTAAAGTCTATT TCTGACAGGAAG AATAGACTTACAAGCCGCAGA G                                                                                                                                                                                                                       |
| IGF2BP3-shRNA4-F                 | GATCC GCAGGAATTGACGCTGTATAA CTTCTGTGCAGA TTATACAGCGTCAATTCCTGC TTTTGG                                                                                                                                                                                                                        |
| IGF2BP3-shRNA4-R                 | AATTCAAAAA GCAGGAATTGACGCTGTATAA TCTGACAGGAAG TTATACAGCGTCAATTCCTGC G                                                                                                                                                                                                                        |
| ELAVL1-shRNA-1-F                 | GATCC TTGTTAGTGTACAACCTCATT CTTCTGTGCAGA AAATGAGTTGTACACTAACAA TTTTGG                                                                                                                                                                                                                        |
| ELAVL1-shRNA-1-R                 | AATTCAAAAA TTGTTAGTGTACAACCTCATT TCTGACAGGAAG AAATGAGTTGTACACTAACAA G                                                                                                                                                                                                                        |
| ELAVL1-shRNA-2-F                 | GATCC TACCAGTTTCAATGGTCATAA CTTCTGTGCAGA TTATGACCATTGAAACTGGTA TTTTGG                                                                                                                                                                                                                        |
| ELAVL1-shRNA-2-R                 | AATTCAAAAA TACCAGTTTCAATGGTCATAA TCTGACAGGAAG TTATGACCATTGAAACTGGTA G                                                                                                                                                                                                                        |
| qRT-PCR primers                  | Sequences                                                                                                                                                                                                                                                                                    |
| ELAVL1-F                         | GGGTGACATCGGGAGAACG                                                                                                                                                                                                                                                                          |
| ELAVL1-R                         | CTGAACAGGCTTCGTAACCTCAT                                                                                                                                                                                                                                                                      |
| CCNH-F                           | TGTTCCGGTGTAAAGCCAGCA                                                                                                                                                                                                                                                                        |
| CCNH-R                           | TCCTGGGGTGATATCCATTACT                                                                                                                                                                                                                                                                       |
| TPR-F                            | AACGCCAGCGTGAGGAATATG                                                                                                                                                                                                                                                                        |
| TPR-R                            | ATTACGTGGTTACCCCTTGCT                                                                                                                                                                                                                                                                        |
| MAP2K1-F                         | CAATGGCGGTGTGGTGTTT                                                                                                                                                                                                                                                                          |
| MAP2K1-R                         | GATTGCGGGTTTGTATCCAG                                                                                                                                                                                                                                                                         |
| KRAS-F                           | ACAGAGAGTGGAGGATGCTTT                                                                                                                                                                                                                                                                        |
| KRAS-R                           | TTTCACACAGCCAGGAGTCTT                                                                                                                                                                                                                                                                        |
| IGF2BP3-F                        | CCAAGCTAGACAAGCACTAGAC                                                                                                                                                                                                                                                                       |
| IGF2BP3-R                        | GCGGCCATTTTCATCAGGGA                                                                                                                                                                                                                                                                         |
| qRT-PCR primers for RIP          | Sequences                                                                                                                                                                                                                                                                                    |
| CCNH-F                           | GAATCACITTTGGCCATGCACT                                                                                                                                                                                                                                                                       |
| CCNH-R                           | TGGTAGCATGTGTGAAAATGGC                                                                                                                                                                                                                                                                       |
| TPR-F                            | GGTCTGCCAGACAAGAGTAG                                                                                                                                                                                                                                                                         |
| TPR-R                            | TTTGGCATTGTTTTCTTTTAACT                                                                                                                                                                                                                                                                      |
| MAP2K1-F                         | TCTGAGGGAGAAGCACAAGA                                                                                                                                                                                                                                                                         |
| MAP2K1-R                         | CAGAGCTTGATCTCCCCACG                                                                                                                                                                                                                                                                         |
| KRAS-F                           | TGGTGGTGTGCCAAGACATT                                                                                                                                                                                                                                                                         |
| KRAS-R                           | ACCAGTGTTAAGAGAAGACTAGCCA                                                                                                                                                                                                                                                                    |

## Role of the IGF2BP3/ELAVL1 complex in colorectal cancer

**Table S2.** IGF2BP3-specific interacted protein targets

| Accession | Gene Name | Mass   | Score | Matches   | Sequences | emPAI | Coverage |
|-----------|-----------|--------|-------|-----------|-----------|-------|----------|
| P23396    | RPS3      | 26842  | 1265  | 118 (74)  | 19 (14)   | 7.22  | 0.65     |
| Q9Y2R9    | MRPS7     | 28230  | 1100  | 90 (49)   | 17 (12)   | 7.35  | 0.61     |
| P11940    | PABPC1    | 70854  | 5989  | 357 (230) | 37 (31)   | 10.04 | 0.57     |
| Q92552    | MRPS27    | 47924  | 958   | 81 (43)   | 23 (14)   | 2.54  | 0.57     |
| Q9P015    | MRPL15    | 33570  | 487   | 54 (22)   | 16 (11)   | 3.12  | 0.53     |
| P63244    | RACK1     | 35511  | 1181  | 77 (45)   | 16 (12)   | 4.45  | 0.51     |
| P62701    | RPS4X     | 29807  | 412   | 56 (22)   | 13 (8)    | 2.55  | 0.49     |
| P07355    | ANXA2     | 38808  | 104   | 27 (5)    | 16 (5)    | 0.77  | 0.48     |
| Q9Y6M1    | IGF2BP2   | 66195  | 9165  | 543 (353) | 30 (28)   | 10.28 | 0.47     |
| Q9NZI8    | IGF2BP1   | 63783  | 6252  | 431 (253) | 30 (19)   | 5.1   | 0.46     |
| P61247    | RPS3A     | 30154  | 989   | 78 (37)   | 16 (9)    | 4.91  | 0.46     |
| Q9HCE1    | MOV10     | 114512 | 988   | 91 (46)   | 39 (28)   | 1.6   | 0.46     |
| P18124    | RPL7      | 29264  | 795   | 73 (34)   | 15 (10)   | 4.02  | 0.46     |
| P82673    | MRPS35    | 37106  | 1226  | 67 (46)   | 16 (13)   | 5.57  | 0.45     |
| P67809    | YBX1      | 35903  | 623   | 47 (20)   | 10 (7)    | 1.89  | 0.45     |
| Q13310    | PABPC4    | 71080  | 3578  | 192 (126) | 29 (24)   | 4.32  | 0.44     |
| P51398    | DAP3      | 45880  | 1739  | 132 (84)  | 20 (17)   | 4.69  | 0.44     |
| Q15717    | ELAVL1    | 36240  | 790   | 43 (27)   | 12 (10)   | 2.12  | 0.44     |
| Q9Y676    | MRPS18B   | 29719  | 729   | 60 (33)   | 11 (9)    | 2.97  | 0.44     |
| P15880    | RPS2      | 31590  | 745   | 61 (40)   | 13 (10)   | 2     | 0.43     |
| P05388    | RPLP0     | 34423  | 451   | 39 (18)   | 11 (6)    | 1.09  | 0.42     |
| P62241    | RPS8      | 24475  | 664   | 47 (26)   | 8 (5)     | 1.79  | 0.41     |
| P62906    | RPL10A    | 24987  | 414   | 41 (16)   | 11 (7)    | 2.98  | 0.41     |
| P82933    | MRPS9     | 46034  | 1314  | 88 (48)   | 16 (13)   | 3.91  | 0.4      |
| P62424    | RPL7A     | 30148  | 963   | 47 (27)   | 14 (9)    | 2.89  | 0.4      |
| P63261    | ACTG1     | 42108  | 525   | 57 (20)   | 11 (6)    | 0.98  | 0.4      |
| P82675    | MRPS5     | 48489  | 506   | 53 (24)   | 19 (8)    | 1.35  | 0.39     |
| Q92841    | DDX17     | 80906  | 499   | 48 (23)   | 25 (16)   | 1.21  | 0.39     |
| Q9UNQ2    | DIMT1     | 35499  | 97    | 14 (5)    | 10 (5)    | 0.87  | 0.39     |
| P82650    | MRPS22    | 41425  | 2693  | 140 (100) | 16 (14)   | 5.82  | 0.38     |
| Q92665    | MRPS31    | 45405  | 1879  | 116 (68)  | 19 (12)   | 3.07  | 0.38     |
| Q02878    | RPL6      | 32765  | 321   | 34 (15)   | 12 (9)    | 1.89  | 0.38     |
| Q9H9J2    | MRPL44    | 37854  | 178   | 21 (5)    | 12 (4)    | 0.52  | 0.38     |
| Q7L2E3    | DHX30     | 134938 | 1423  | 111 (64)  | 42 (33)   | 1.48  | 0.37     |
| Q9Y399    | MRPS2     | 33513  | 603   | 97 (38)   | 15 (13)   | 6.26  | 0.37     |
| Q96DV4    | MRPL38    | 44968  | 391   | 44 (19)   | 14 (9)    | 1.9   | 0.37     |
| Q07955    | SRSF1     | 27842  | 304   | 24 (15)   | 10 (6)    | 0.97  | 0.37     |
| Q96EY7    | PTCD3     | 79184  | 1776  | 121 (74)  | 25 (19)   | 2.12  | 0.36     |
| Q9NYK5    | MRPL39    | 39200  | 323   | 29 (16)   | 12 (10)   | 1.87  | 0.36     |
| P46777    | RPL5      | 34569  | 315   | 34 (15)   | 13 (8)    | 2.01  | 0.36     |
| P22626    | HNRNPA2B1 | 37464  | 111   | 31 (6)    | 11 (5)    | 0.53  | 0.36     |
| Q13084    | MRPL28    | 30252  | 77    | 27 (4)    | 9 (2)     | 0.87  | 0.36     |
| Q6PKG0    | LARP1     | 123833 | 1183  | 117 (45)  | 32 (17)   | 0.92  | 0.35     |
| Q9NZB2    | FAM120A   | 123008 | 1036  | 72 (37)   | 32 (20)   | 1.03  | 0.35     |
| Q1KMD3    | HNRNPUL2  | 85622  | 954   | 72 (34)   | 28 (17)   | 1.2   | 0.35     |
| P16403    | HIST1H1C  | 21352  | 360   | 23 (14)   | 8 (5)     | 1.41  | 0.35     |
| Q9BZE1    | MRPL37    | 48600  | 407   | 37 (16)   | 15 (10)   | 1.2   | 0.34     |

## Role of the IGF2BP3/ELAVL1 complex in colorectal cancer

|        |          |        |      |          |         |      |      |
|--------|----------|--------|------|----------|---------|------|------|
| P82930 | MRPS34   | 25692  | 226  | 37 (15)  | 10 (7)  | 2.4  | 0.34 |
| P49406 | MRPL19   | 33799  | 140  | 18 (8)   | 11 (6)  | 1.12 | 0.34 |
| P07910 | HNRNPC   | 33707  | 602  | 52 (23)  | 12 (6)  | 1.55 | 0.33 |
| P49411 | TUFM     | 49852  | 212  | 27 (8)   | 14 (6)  | 0.57 | 0.33 |
| O76021 | RSL1D1   | 55167  | 136  | 26 (10)  | 16 (9)  | 0.68 | 0.33 |
| Q96A35 | MRPL24   | 25013  | 121  | 23 (7)   | 7 (4)   | 0.65 | 0.33 |
| P62979 | RPS27A   | 18296  | 98   | 12 (4)   | 5 (2)   | 0.4  | 0.33 |
| Q96HS1 | PGAM5    | 32213  | 86   | 25 (9)   | 10 (6)  | 0.8  | 0.33 |
| Q9Y5M8 | SRPRB    | 29912  | 54   | 8 (3)    | 7 (3)   | 0.53 | 0.33 |
| Q9UN81 | L1RE1    | 40259  | 811  | 56 (30)  | 11 (7)  | 1.58 | 0.32 |
| Q9BYD6 | MRPL1    | 37113  | 341  | 27 (15)  | 10 (7)  | 0.98 | 0.32 |
| P36578 | RPL4     | 47953  | 219  | 42 (12)  | 14 (8)  | 0.82 | 0.32 |
| P68363 | TUBA1B   | 50804  | 181  | 21 (8)   | 10 (4)  | 0.37 | 0.32 |
| P05141 | SLC25A5  | 33059  | 155  | 33 (11)  | 12 (6)  | 0.95 | 0.32 |
| Q9UKM9 | RALY     | 32501  | 133  | 17 (7)   | 9 (4)   | 0.63 | 0.32 |
| P22087 | FBL      | 33877  | 72   | 14 (4)   | 9 (3)   | 0.32 | 0.32 |
| P40926 | MDH2     | 35937  | 60   | 10 (2)   | 8 (2)   | 0.19 | 0.32 |
| P08865 | RPSA     | 32947  | 1144 | 57 (34)  | 10 (8)  | 1.87 | 0.31 |
| Q9NR30 | DDX21    | 87804  | 706  | 65 (37)  | 23 (17) | 1.24 | 0.31 |
| Q12905 | ILF2     | 43263  | 578  | 37 (29)  | 12 (10) | 1.42 | 0.31 |
| O43390 | HNRNPR   | 71184  | 531  | 44 (28)  | 19 (14) | 1.36 | 0.31 |
| O00303 | EIF3F    | 37654  | 333  | 22 (11)  | 9 (7)   | 0.96 | 0.31 |
| Q9BYD3 | MRPL4    | 34954  | 322  | 26 (12)  | 8 (4)   | 0.89 | 0.31 |
| P62753 | RPS6     | 28834  | 528  | 44 (22)  | 10 (6)  | 1.67 | 0.3  |
| Q9H0A0 | NAT10    | 116569 | 289  | 43 (14)  | 28 (13) | 0.56 | 0.3  |
| Q96PU8 | QKI      | 37761  | 194  | 16 (9)   | 8 (6)   | 0.66 | 0.3  |
| P38919 | EIF4A3   | 47126  | 95   | 18 (5)   | 14 (4)  | 0.5  | 0.3  |
| P11142 | HSPA8    | 71082  | 534  | 46 (24)  | 18 (11) | 1.06 | 0.29 |
| Q9HC16 | APOBEC3G | 47233  | 337  | 48 (24)  | 12 (10) | 1.75 | 0.29 |
| O60506 | SYNCRIP  | 69788  | 971  | 55 (37)  | 17 (12) | 1.18 | 0.28 |
| Q92900 | UPF1     | 125578 | 669  | 50 (31)  | 27 (19) | 0.9  | 0.28 |
| P17844 | DDX5     | 69618  | 441  | 30 (20)  | 18 (10) | 0.74 | 0.28 |
| P02538 | KRT6A    | 60293  | 187  | 29 (14)  | 16 (8)  | 0.61 | 0.28 |
| Q13347 | EIF3I    | 36878  | 104  | 10 (5)   | 8 (4)   | 0.41 | 0.28 |
| P35250 | RFC2     | 39588  | 95   | 12 (4)   | 8 (3)   | 0.27 | 0.28 |
| Q5T653 | MRPL2    | 33565  | 87   | 13 (4)   | 7 (3)   | 0.33 | 0.28 |
| Q00839 | HNRNPU   | 91269  | 2289 | 134 (79) | 24 (16) | 1.78 | 0.27 |
| Q12906 | ILF3     | 95678  | 511  | 61 (29)  | 21 (13) | 0.6  | 0.27 |
| P38159 | RBMX     | 42306  | 490  | 36 (20)  | 11 (6)  | 0.83 | 0.27 |
| P10809 | HSPD1    | 61187  | 259  | 19 (9)   | 12 (8)  | 0.52 | 0.27 |
| O75127 | PTCD1    | 79433  | 258  | 26 (12)  | 15 (9)  | 0.62 | 0.27 |
| Q15365 | PCBP1    | 37987  | 153  | 17 (6)   | 7 (3)   | 0.4  | 0.27 |
| Q96PM9 | ZNF385A  | 40771  | 129  | 12 (4)   | 9 (4)   | 0.48 | 0.27 |
| P39023 | RPL3     | 46365  | 604  | 40 (26)  | 14 (13) | 2.22 | 0.26 |
| P04406 | GAPDH    | 36201  | 148  | 14 (5)   | 8 (4)   | 0.42 | 0.26 |
| P16401 | HIST1H1B | 22566  | 129  | 9 (5)    | 6 (4)   | 0.74 | 0.26 |
| Q6PK04 | CCDC137  | 33268  | 35   | 7 (1)    | 6 (1)   | 0.1  | 0.26 |
| Q99729 | HNRNPAB  | 36316  | 456  | 30 (18)  | 9 (4)   | 1.01 | 0.25 |

## Role of the IGF2BP3/ELAVL1 complex in colorectal cancer

|            |          |        |     |         |         |      |      |
|------------|----------|--------|-----|---------|---------|------|------|
| P52272     | HNRNPM   | 77749  | 315 | 29 (16) | 17 (9)  | 0.58 | 0.25 |
| P16989     | YBX3     | 40066  | 285 | 19 (9)  | 9 (5)   | 0.74 | 0.25 |
| P07437     | TUBB     | 50095  | 219 | 25 (9)  | 10 (5)  | 0.47 | 0.25 |
| Q9Y262     | EIF3L    | 66912  | 197 | 16 (6)  | 13 (5)  | 0.4  | 0.25 |
| P68371     | TUBB4B   | 50255  | 184 | 19 (8)  | 10 (4)  | 0.37 | 0.25 |
| P60228     | EIF3E    | 52587  | 179 | 17 (7)  | 11 (5)  | 0.53 | 0.25 |
| O75569     | PRKRA    | 34839  | 94  | 13 (7)  | 6 (3)   | 0.44 | 0.25 |
| Q96E29     | MTERF3   | 48055  | 81  | 93 (5)  | 11 (3)  | 0.39 | 0.25 |
| Q96AG4     | LRRC59   | 35308  | 74  | 13 (5)  | 7 (3)   | 0.57 | 0.25 |
| Q08211     | DHX9     | 142181 | 970 | 61 (38) | 26 (18) | 0.76 | 0.24 |
| Q9BQG0     | MYBBP1A  | 149731 | 467 | 59 (19) | 31 (13) | 0.41 | 0.24 |
| P04259     | KRT6B    | 60315  | 457 | 39 (26) | 14 (8)  | 0.61 | 0.24 |
| Q9BUJ2     | HNRNPUL1 | 96250  | 316 | 30 (17) | 17 (8)  | 0.54 | 0.24 |
| P46087     | NOP2     | 89589  | 315 | 22 (13) | 15 (11) | 0.54 | 0.24 |
| P61978     | HNRNPK   | 51230  | 211 | 13 (6)  | 10 (5)  | 0.45 | 0.24 |
| Q13151     | HNRNPA0  | 30993  | 147 | 17 (6)  | 6 (2)   | 0.36 | 0.24 |
| Q02978     | SLC25A11 | 34211  | 101 | 11 (2)  | 7 (2)   | 0.32 | 0.24 |
| Q14498     | RBM39    | 59628  | 371 | 21 (11) | 10 (5)  | 0.31 | 0.23 |
| Q15366     | PCBP2    | 38955  | 252 | 17 (9)  | 6 (4)   | 0.5  | 0.23 |
| P43243     | MATR3    | 95078  | 248 | 38 (13) | 17 (10) | 0.78 | 0.23 |
| Q9BQ39     | DDX50    | 83084  | 238 | 28 (13) | 14 (9)  | 0.42 | 0.23 |
| P51991     | HNRNPA3  | 39799  | 172 | 17 (4)  | 7 (3)   | 0.27 | 0.23 |
| P49748     | ACADVL   | 70745  | 156 | 16 (6)  | 12 (5)  | 0.31 | 0.23 |
| P50914     | RPL14    | 23531  | 152 | 10 (6)  | 5 (2)   | 0.49 | 0.23 |
| Q96DH6     | MSI2     | 35345  | 152 | 15 (6)  | 7 (4)   | 0.57 | 0.23 |
| Q96SI9     | STRBP    | 74290  | 108 | 22 (7)  | 13 (3)  | 0.14 | 0.23 |
| Q9Y3Y2     | CHTOP    | 26380  | 82  | 8 (1)   | 5 (1)   | 0.13 | 0.23 |
| O75616     | ERAL1    | 48833  | 74  | 10 (4)  | 7 (3)   | 0.22 | 0.23 |
| Q99848     | EBNA1BP2 | 34887  | 43  | 9 (2)   | 6 (2)   | 0.2  | 0.23 |
| Q8IU4      | APOBEC3F | 45846  | 432 | 33 (17) | 10 (7)  | 0.87 | 0.22 |
| Q71RC2     | LARP4    | 81230  | 101 | 18 (4)  | 12 (4)  | 0.22 | 0.22 |
| Q9BQ75     | CMSS1    | 32149  | 89  | 18 (7)  | 7 (4)   | 0.63 | 0.22 |
| Q9NUD5     | ZCCHC3   | 44389  | 45  | 10 (1)  | 9 (1)   | 0.07 | 0.22 |
| P09001     | MRPL3    | 38893  | 287 | 15 (10) | 7 (6)   | 0.92 | 0.21 |
| Q16629     | SRSF7    | 27578  | 97  | 10 (3)  | 6 (3)   | 0.41 | 0.21 |
| Q9NX20     | MRPL16   | 28488  | 74  | 21 (5)  | 6 (3)   | 0.94 | 0.21 |
| Q14103     | HNRNPD   | 38581  | 602 | 36 (22) | 8 (4)   | 0.51 | 0.2  |
| P11021     | HSPA5    | 72402  | 335 | 17 (10) | 12 (6)  | 0.36 | 0.2  |
| Q96I24     | FUBP3    | 61944  | 134 | 8 (4)   | 8 (4)   | 0.3  | 0.2  |
| Q9BYG3     | NIFK     | 34372  | 126 | 6 (3)   | 4 (3)   | 0.45 | 0.2  |
| AOA0AOMS14 | IGHV1-45 | 13614  | 90  | 3 (2)   | 2 (1)   | 0.25 | 0.2  |
| Q9BRJ2     | MRPL45   | 35613  | 81  | 18 (3)  | 8 (2)   | 0.31 | 0.2  |
| O95793     | STAU1    | 63428  | 71  | 10 (2)  | 9 (2)   | 0.16 | 0.2  |
| Q7Z7H8     | MRPL10   | 29492  | 65  | 9 (3)   | 4 (2)   | 0.24 | 0.2  |
| P11387     | TOP1     | 91125  | 51  | 28 (2)  | 15 (2)  | 0.11 | 0.2  |
| Q5RKV6     | EXOSC6   | 28503  | 37  | 7 (1)   | 5 (1)   | 0.12 | 0.2  |
| P40937     | RFC5     | 38757  | 34  | 9 (2)   | 7 (2)   | 0.18 | 0.2  |
| P38646     | HSPA9    | 73920  | 183 | 17 (7)  | 10 (5)  | 0.24 | 0.19 |
| Q9UJS0     | SLC25A13 | 74528  | 177 | 13 (6)  | 9 (4)   | 0.3  | 0.19 |

## Role of the IGF2BP3/ELAVL1 complex in colorectal cancer

|            |           |        |      |         |         |      |      |
|------------|-----------|--------|------|---------|---------|------|------|
| Q9BVP2     | GNL3      | 62468  | 169  | 14 (9)  | 10 (7)  | 0.51 | 0.19 |
| P55884     | EIF3B     | 92823  | 157  | 16 (6)  | 13 (5)  | 0.19 | 0.19 |
| Q9NVP1     | DDX18     | 75702  | 154  | 19 (6)  | 11 (5)  | 0.24 | 0.19 |
| Q9Y2P8     | RCL1      | 41273  | 81   | 9 (3)   | 6 (3)   | 0.26 | 0.19 |
| P62750     | RPL23A    | 17684  | 63   | 3 (1)   | 2 (1)   | 0.19 | 0.19 |
| Q9UKD2     | MRT04     | 27657  | 44   | 4 (1)   | 4 (1)   | 0.12 | 0.19 |
| P62258     | YWHAE     | 29326  | 44   | 5 (2)   | 5 (2)   | 0.38 | 0.19 |
| Q8WVM0     | TFB1M     | 39860  | 42   | 7 (3)   | 5 (2)   | 0.17 | 0.19 |
| Q92522     | H1FX      | 22474  | 358  | 24 (19) | 6 (5)   | 1.31 | 0.18 |
| P62917     | RPL8      | 28235  | 291  | 24 (12) | 5 (4)   | 1.44 | 0.18 |
| P12956     | XRCC6     | 70084  | 279  | 21 (9)  | 10 (6)  | 0.51 | 0.18 |
| Q9H2U1     | DHX36     | 115600 | 267  | 23 (12) | 14 (10) | 0.36 | 0.18 |
| Q9H0D6     | XRN2      | 109426 | 249  | 21 (11) | 14 (7)  | 0.27 | 0.18 |
| Q9H2W6     | MRPL46    | 31799  | 202  | 10 (7)  | 5 (5)   | 0.82 | 0.18 |
| P08238     | HSP90AB1  | 83554  | 196  | 16 (7)  | 11 (4)  | 0.17 | 0.18 |
| P35249     | RFC4      | 40170  | 186  | 14 (7)  | 7 (5)   | 0.49 | 0.18 |
| O00411     | POLRMT    | 140300 | 135  | 25 (8)  | 16 (7)  | 0.17 | 0.18 |
| Q7L2H7     | EIF3M     | 42932  | 78   | 11 (2)  | 8 (2)   | 0.25 | 0.18 |
| Q9Y2R4     | DDX52     | 67798  | 57   | 16 (2)  | 9 (2)   | 0.1  | 0.18 |
| Q9BVI4     | NOC4L     | 58830  | 54   | 18 (2)  | 9 (2)   | 0.18 | 0.18 |
| Q8WXX5     | DNAJC9    | 30062  | 46   | 6 (1)   | 5 (1)   | 0.23 | 0.18 |
| Q9BZE4     | GTPBP4    | 74317  | 44   | 15 (2)  | 10 (2)  | 0.09 | 0.18 |
| Q07352     | ZFP36L1   | 36747  | 36   | 5 (1)   | 5 (1)   | 0.09 | 0.18 |
| Q8NEJ9     | NGDN      | 35872  | 32   | 6 (1)   | 4 (1)   | 0.09 | 0.18 |
| P04792     | HSPB1     | 22826  | 32   | 3 (1)   | 3 (1)   | 0.15 | 0.18 |
| Q14152     | EIF3A     | 166867 | 364  | 35 (17) | 22 (10) | 0.29 | 0.17 |
| B5ME19     | EIF3CL    | 106091 | 221  | 17 (8)  | 13 (7)  | 0.28 | 0.17 |
| P07900     | HSP90AA1  | 85006  | 203  | 18 (8)  | 12 (5)  | 0.21 | 0.17 |
| P57721     | PCBP3     | 39725  | 186  | 16 (7)  | 5 (3)   | 0.38 | 0.17 |
| P35251     | RFC1      | 128688 | 176  | 29 (5)  | 14 (5)  | 0.13 | 0.17 |
| P04843     | RPN1      | 68641  | 162  | 10 (5)  | 9 (5)   | 0.32 | 0.17 |
| P19338     | NCL       | 76625  | 140  | 28 (7)  | 11 (6)  | 0.29 | 0.17 |
| Q9H936     | SLC25A22  | 34904  | 85   | 7 (2)   | 5 (2)   | 0.2  | 0.17 |
| Q9UH17     | APOBEC3B  | 46749  | 82   | 16 (5)  | 7 (3)   | 0.31 | 0.17 |
| Q15024     | EXOSC7    | 32428  | 27   | 3 (1)   | 3 (1)   | 0.1  | 0.17 |
| Q96H79     | ZC3HAV1L  | 33967  | 25   | 3 (0)   | 3 (0)   | 0.1  | 0.17 |
| O75323     | NIPSNAP2  | 33949  | 16   | 5 (0)   | 5 (0)   | 0.1  | 0.17 |
| A0A075B6S2 | IGKV2D-29 | 13249  | 1706 | 40 (35) | 2 (2)   | 0.58 | 0.16 |
| Q7Z2W4     | ZC3HAV1   | 103135 | 133  | 13 (4)  | 11 (3)  | 0.1  | 0.16 |
| P40938     | RFC3      | 41328  | 92   | 8 (4)   | 6 (3)   | 0.36 | 0.16 |
| P52597     | HNRNPF    | 45985  | 83   | 16 (3)  | 5 (2)   | 0.23 | 0.16 |
| O00566     | MPHOSPH10 | 78930  | 69   | 9 (3)   | 8 (3)   | 0.13 | 0.16 |
| P09651     | HNRNPA1   | 38837  | 62   | 15 (2)  | 6 (2)   | 0.18 | 0.16 |
| P26368     | U2AF2     | 53809  | 59   | 10 (2)  | 5 (2)   | 0.13 | 0.16 |
| Q9NX58     | LYAR      | 44044  | 52   | 10 (2)  | 5 (2)   | 0.24 | 0.16 |
| O60762     | DPM1      | 29673  | 42   | 5 (1)   | 4 (1)   | 0.11 | 0.16 |
| P11388     | TOP2A     | 175017 | 262  | 46 (12) | 23 (9)  | 0.25 | 0.15 |
| Q96GQ7     | DDX27     | 90292  | 202  | 13 (7)  | 12 (6)  | 0.28 | 0.15 |
| O43143     | DHX15     | 91673  | 167  | 16 (6)  | 11 (4)  | 0.19 | 0.15 |

## Role of the IGF2BP3/ELAVL1 complex in colorectal cancer

|        |          |        |     |         |        |      |      |
|--------|----------|--------|-----|---------|--------|------|------|
| Q96PK6 | RBM14    | 69620  | 152 | 12 (4)  | 9 (4)  | 0.26 | 0.15 |
| P0DMV8 | HSPA1A   | 70294  | 85  | 16 (5)  | 11 (5) | 0.26 | 0.15 |
| P50416 | CPT1A    | 88995  | 77  | 16 (4)  | 11 (4) | 0.2  | 0.15 |
| Q13868 | EXOSC2   | 32996  | 67  | 3 (1)   | 3 (1)  | 0.1  | 0.15 |
| O75821 | EIF3G    | 35874  | 65  | 9 (2)   | 5 (2)  | 0.19 | 0.15 |
| Q00577 | PURA     | 35003  | 64  | 13 (2)  | 7 (1)  | 0.2  | 0.15 |
| Q13243 | SRSF5    | 31359  | 64  | 8 (2)   | 5 (2)  | 0.22 | 0.15 |
| P02786 | TFRC     | 85274  | 61  | 21 (3)  | 9 (3)  | 0.12 | 0.15 |
| O95831 | AIFM1    | 67144  | 57  | 7 (1)   | 7 (1)  | 0.05 | 0.15 |
| Q9BRZ2 | TRIM56   | 83147  | 43  | 9 (1)   | 7 (1)  | 0.04 | 0.15 |
| Q9NW13 | RBM28    | 86198  | 41  | 13 (2)  | 9 (2)  | 0.08 | 0.15 |
| P05023 | ATP1A1   | 114135 | 219 | 22 (7)  | 11 (6) | 0.18 | 0.14 |
| Q5VTE0 | EEF1A1P5 | 50495  | 208 | 19 (9)  | 7 (3)  | 0.37 | 0.14 |
| P78316 | NOP14    | 98292  | 154 | 14 (4)  | 10 (4) | 0.14 | 0.14 |
| Q15758 | SLC1A5   | 57018  | 143 | 10 (3)  | 7 (3)  | 0.25 | 0.14 |
| Q8TDD1 | DDX54    | 98819  | 121 | 11 (3)  | 9 (2)  | 0.14 | 0.14 |
| P47914 | RPL29    | 17798  | 111 | 7 (3)   | 2 (1)  | 0.42 | 0.14 |
| Q96QR8 | PURB     | 33392  | 64  | 12 (1)  | 7 (1)  | 0.21 | 0.14 |
| P60842 | EIF4A1   | 46353  | 60  | 6 (4)   | 5 (3)  | 0.23 | 0.14 |
| Q01844 | EWSR1    | 68721  | 59  | 9 (3)   | 6 (2)  | 0.1  | 0.14 |
| Q9Y5B9 | SUPT16H  | 120409 | 46  | 19 (1)  | 12 (1) | 0.03 | 0.14 |
| P26038 | MSN      | 67892  | 36  | 9 (1)   | 8 (1)  | 0.05 | 0.14 |
| P39656 | DDOST    | 50940  | 35  | 5 (1)   | 5 (1)  | 0.06 | 0.14 |
| P02768 | ALB      | 71317  | 814 | 40 (24) | 9 (2)  | 0.14 | 0.13 |
| P06748 | NPM1     | 32726  | 334 | 23 (10) | 4 (1)  | 0.21 | 0.13 |
| Q2NL82 | TSR1     | 92151  | 154 | 13 (5)  | 10 (4) | 0.23 | 0.13 |
| Q07020 | RPL18    | 21735  | 85  | 4 (1)   | 2 (1)  | 0.15 | 0.13 |
| Q9Y4P3 | TBL2     | 50393  | 85  | 4 (2)   | 4 (2)  | 0.14 | 0.13 |
| Q13601 | KRR1     | 43866  | 75  | 7 (3)   | 5 (3)  | 0.24 | 0.13 |
| P55084 | HADHB    | 51547  | 69  | 10 (3)  | 7 (3)  | 0.2  | 0.13 |
| O95218 | ZRANB2   | 37838  | 63  | 5 (2)   | 4 (1)  | 0.09 | 0.13 |
| Q8NHQ9 | DDX55    | 69073  | 61  | 7 (1)   | 7 (1)  | 0.05 | 0.13 |
| Q99623 | PHB2     | 33276  | 41  | 5 (1)   | 4 (1)  | 0.1  | 0.13 |
| P83731 | RPL24    | 17882  | 38  | 2 (1)   | 2 (1)  | 0.19 | 0.13 |
| P10155 | TROVE2   | 61372  | 37  | 7 (1)   | 6 (1)  | 0.05 | 0.13 |
| O75934 | BCAS2    | 26229  | 33  | 4 (1)   | 4 (1)  | 0.13 | 0.13 |
| Q9UG63 | ABCF2    | 71815  | 29  | 10 (1)  | 7 (1)  | 0.05 | 0.13 |
| P12004 | PCNA     | 29092  | 25  | 3 (0)   | 3 (0)  | 0.11 | 0.13 |
| P35637 | FUS      | 53622  | 186 | 11 (8)  | 5 (5)  | 0.52 | 0.12 |
| P42704 | LRPPRC   | 159003 | 117 | 17 (6)  | 14 (4) | 0.13 | 0.12 |
| Q6P158 | DHX57    | 157103 | 108 | 16 (3)  | 13 (2) | 0.11 | 0.12 |
| P40939 | HADHA    | 83688  | 105 | 9 (4)   | 7 (4)  | 0.17 | 0.12 |
| Q4G0J3 | LARP7    | 67143  | 100 | 9 (4)   | 6 (2)  | 0.1  | 0.12 |
| Q92804 | TAF15    | 62021  | 89  | 8 (4)   | 4 (3)  | 0.17 | 0.12 |
| P27348 | YWHAQ    | 28032  | 83  | 3 (1)   | 3 (1)  | 0.25 | 0.12 |
| O15371 | EIF3D    | 64560  | 69  | 10 (2)  | 7 (2)  | 0.1  | 0.12 |
| Q9BXP5 | SRRT     | 101060 | 65  | 8 (1)   | 8 (1)  | 0.03 | 0.12 |
| Q15293 | RCN1     | 38866  | 65  | 5 (2)   | 4 (2)  | 0.18 | 0.12 |
| P38117 | ETFB     | 28054  | 63  | 3 (2)   | 3 (2)  | 0.4  | 0.12 |

## Role of the IGF2BP3/ELAVL1 complex in colorectal cancer

|            |          |        |     |         |        |      |      |
|------------|----------|--------|-----|---------|--------|------|------|
| Q99575     | POP1     | 116346 | 50  | 15 (2)  | 11 (2) | 0.12 | 0.12 |
| O00159     | MYO1C    | 122461 | 49  | 12 (2)  | 10 (2) | 0.05 | 0.12 |
| Q9BVJ6     | UTP14A   | 88095  | 48  | 14 (1)  | 9 (1)  | 0.04 | 0.12 |
| P14866     | HNRNPL   | 64720  | 44  | 7 (2)   | 6 (2)  | 0.1  | 0.12 |
| Q9UHB7     | AFF4     | 127781 | 38  | 18 (1)  | 12 (1) | 0.03 | 0.12 |
| Q9UHB9     | SRP68    | 71199  | 37  | 8 (1)   | 7 (1)  | 0.05 | 0.12 |
| Q01650     | SLC7A5   | 55659  | 32  | 6 (1)   | 5 (1)  | 0.06 | 0.12 |
| P07477     | PRSS1    | 27111  | 277 | 24 (12) | 2 (1)  | 0.26 | 0.11 |
| Q14692     | BMS1     | 146571 | 188 | 15 (10) | 12 (8) | 0.25 | 0.11 |
| Q9P2E9     | RRBP1    | 152780 | 121 | 23 (2)  | 14 (1) | 0.04 | 0.11 |
| Q13428     | TCOF1    | 152243 | 96  | 30 (1)  | 11 (1) | 0.02 | 0.11 |
| Q99459     | CDC5L    | 92422  | 92  | 13 (3)  | 8 (2)  | 0.07 | 0.11 |
| Q7Z417     | NUFIP2   | 76132  | 88  | 10 (2)  | 6 (2)  | 0.09 | 0.11 |
| Q01130     | SRSF2    | 25461  | 87  | 6 (2)   | 2 (1)  | 0.13 | 0.11 |
| O00571     | DDX3X    | 73597  | 73  | 8 (3)   | 7 (2)  | 0.14 | 0.11 |
| Q9H6S0     | YTHDC2   | 161573 | 60  | 14 (3)  | 14 (3) | 0.06 | 0.11 |
| E9PAV3     | NACA     | 205979 | 58  | 19 (2)  | 15 (2) | 0.03 | 0.11 |
| P13010     | XRCC5    | 83222  | 57  | 9 (2)   | 8 (1)  | 0.08 | 0.11 |
| Q9H9B4     | SFXN1    | 35881  | 54  | 4 (2)   | 4 (2)  | 0.19 | 0.11 |
| Q13283     | G3BP1    | 52189  | 53  | 4 (1)   | 4 (1)  | 0.06 | 0.11 |
| Q9H7E9     | C8orf33  | 25319  | 50  | 2 (1)   | 2 (1)  | 0.13 | 0.11 |
| P17858     | PFKL     | 85762  | 49  | 7 (1)   | 7 (1)  | 0.04 | 0.11 |
| Q9Y446     | PKP3     | 87485  | 48  | 11 (2)  | 8 (2)  | 0.08 | 0.11 |
| Q9BQA1     | WDR77    | 37442  | 45  | 5 (2)   | 4 (2)  | 0.18 | 0.11 |
| P31689     | DNAJA1   | 45581  | 29  | 5 (1)   | 4 (1)  | 0.07 | 0.11 |
| P55265     | ADAR     | 137178 | 27  | 16 (1)  | 12 (1) | 0.05 | 0.11 |
| P61313     | RPL15    | 24245  | 19  | 3 (0)   | 2 (0)  | 0.14 | 0.11 |
| P07195     | LDHB     | 36900  | 87  | 3 (1)   | 3 (1)  | 0.19 | 0.1  |
| O75165     | DNAJC13  | 256533 | 72  | 19 (3)  | 18 (3) | 0.05 | 0.1  |
| P05362     | ICAM1    | 58587  | 71  | 4 (2)   | 4 (2)  | 0.12 | 0.1  |
| Q13247     | SRSF6    | 39677  | 71  | 5 (2)   | 4 (2)  | 0.17 | 0.1  |
| Q13206     | DDX10    | 101168 | 70  | 7 (2)   | 6 (2)  | 0.07 | 0.1  |
| P78362     | SRPK2    | 78219  | 63  | 9 (3)   | 5 (2)  | 0.09 | 0.1  |
| AOA0C4DH68 | IGKV2-24 | 13185  | 63  | 3 (1)   | 1 (1)  | 0.26 | 0.1  |
| Q86V81     | ALYREF   | 26872  | 60  | 4 (2)   | 3 (1)  | 0.12 | 0.1  |
| P48651     | PTDSS1   | 56175  | 53  | 6 (1)   | 4 (1)  | 0.06 | 0.1  |
| Q9BRU9     | UTP23    | 28783  | 52  | 2 (1)   | 2 (1)  | 0.12 | 0.1  |
| Q8NC60     | NOA1     | 78979  | 49  | 7 (1)   | 5 (1)  | 0.04 | 0.1  |
| Q8N5C6     | SRBD1    | 112960 | 49  | 11 (2)  | 10 (2) | 0.06 | 0.1  |
| Q9Y5J1     | UTP18    | 62421  | 48  | 5 (1)   | 4 (1)  | 0.05 | 0.1  |
| P35579     | MYH9     | 227646 | 44  | 25 (2)  | 16 (2) | 0.03 | 0.1  |
| Q9NZ01     | TECR     | 36410  | 39  | 4 (1)   | 3 (1)  | 0.09 | 0.1  |
| P32322     | PYCR1    | 33568  | 37  | 2 (1)   | 2 (1)  | 0.1  | 0.1  |
| Q96QD9     | FYTTD1   | 35853  | 37  | 4 (1)   | 4 (1)  | 0.09 | 0.1  |
| O00299     | CLIC1    | 27248  | 36  | 2 (1)   | 2 (1)  | 0.12 | 0.1  |
| Q9Y2X3     | NOP58    | 60054  | 36  | 5 (1)   | 4 (1)  | 0.11 | 0.1  |
| Q5VWQ0     | RSBN1    | 90928  | 32  | 6 (1)   | 6 (1)  | 0.04 | 0.1  |
| P07305     | H1FO     | 20850  | 29  | 3 (1)   | 2 (1)  | 0.16 | 0.1  |
| Q15633     | TARBP2   | 39642  | 29  | 3 (1)   | 3 (1)  | 0.08 | 0.1  |

## Role of the IGF2BP3/ELAVL1 complex in colorectal cancer

|            |          |        |     |        |        |      |      |
|------------|----------|--------|-----|--------|--------|------|------|
| P48634     | PRRC2A   | 229180 | 29  | 20 (1) | 15 (1) | 0.01 | 0.1  |
| Q9NQZ2     | UTP3     | 54639  | 24  | 5 (1)  | 4 (1)  | 0.06 | 0.1  |
| Q02880     | TOP2B    | 184122 | 132 | 26 (5) | 14 (5) | 0.11 | 0.09 |
| Q09161     | NCBP1    | 92864  | 117 | 7 (4)  | 6 (3)  | 0.11 | 0.09 |
| Q13200     | PSMD2    | 100877 | 112 | 8 (4)  | 6 (4)  | 0.14 | 0.09 |
| P09874     | PARP1    | 113811 | 94  | 10 (3) | 9 (3)  | 0.09 | 0.09 |
| Q9UHX1     | PUF60    | 60009  | 80  | 8 (2)  | 4 (1)  | 0.05 | 0.09 |
| O75909     | CCNK     | 64598  | 64  | 6 (3)  | 3 (2)  | 0.1  | 0.09 |
| Q92499     | DDX1     | 83349  | 62  | 7 (2)  | 6 (2)  | 0.08 | 0.09 |
| Q9H8H2     | DDX31    | 94770  | 56  | 6 (1)  | 6 (1)  | 0.03 | 0.09 |
| Q14331     | FRG1     | 29439  | 46  | 2 (1)  | 2 (1)  | 0.11 | 0.09 |
| Q13823     | GNL2     | 83831  | 43  | 5 (1)  | 5 (1)  | 0.04 | 0.09 |
| Q03169     | TNFAIP2  | 73015  | 39  | 6 (1)  | 5 (1)  | 0.04 | 0.09 |
| Q3KQU3     | MAP7D1   | 93106  | 36  | 8 (1)  | 7 (1)  | 0.04 | 0.09 |
| P08579     | SNRPB2   | 25470  | 36  | 3 (1)  | 2 (1)  | 0.13 | 0.09 |
| Q8NDT2     | RBM15B   | 97432  | 35  | 6 (1)  | 6 (1)  | 0.03 | 0.09 |
| Q86VM9     | ZC3H18   | 106544 | 33  | 19 (1) | 7 (1)  | 0.03 | 0.09 |
| P55060     | CSE1L    | 111145 | 31  | 8 (1)  | 8 (1)  | 0.06 | 0.09 |
| Q9UBP9     | GULP1    | 34925  | 30  | 34 (2) | 2 (1)  | 0.09 | 0.09 |
| O60841     | EIF5B    | 139198 | 30  | 11 (1) | 10 (1) | 0.02 | 0.09 |
| P01859     | IGHG2    | 36505  | 29  | 7 (1)  | 3 (1)  | 0.09 | 0.09 |
| A0A0C4DH31 | IGHV1-18 | 12926  | 26  | 1 (1)  | 1 (1)  | 0.27 | 0.09 |
| Q96T17     | MAP7D2   | 82371  | 26  | 5 (0)  | 5 (0)  | 0.04 | 0.09 |
| Q9H6R4     | NOL6     | 128368 | 25  | 10 (0) | 9 (0)  | 0.03 | 0.09 |
| Q8ND30     | PPFIBP2  | 99053  | 21  | 11 (0) | 6 (0)  | 0.03 | 0.09 |
| O14744     | PRMT5    | 73322  | 107 | 15 (2) | 5 (2)  | 0.14 | 0.08 |
| P42285     | MTREX    | 118756 | 82  | 20 (3) | 8 (3)  | 0.08 | 0.08 |
| Q9Y383     | LUC7L2   | 46942  | 76  | 6 (2)  | 3 (2)  | 0.15 | 0.08 |
| Q13595     | TRA2A    | 32726  | 69  | 3 (2)  | 2 (2)  | 0.21 | 0.08 |
| Q00325     | SLC25A3  | 40525  | 63  | 9 (2)  | 4 (1)  | 0.08 | 0.08 |
| O43242     | PSMD3    | 61054  | 54  | 6 (1)  | 4 (1)  | 0.05 | 0.08 |
| Q9GZR7     | DDX24    | 96899  | 42  | 8 (3)  | 7 (2)  | 0.1  | 0.08 |
| P26641     | EEF1G    | 50429  | 41  | 5 (1)  | 4 (1)  | 0.07 | 0.08 |
| Q86U38     | NOP9     | 70136  | 38  | 7 (1)  | 5 (1)  | 0.05 | 0.08 |
| Q15645     | TRIP13   | 48863  | 37  | 10 (1) | 4 (1)  | 0.07 | 0.08 |
| Q86UE4     | MTDH     | 63856  | 36  | 5 (1)  | 4 (1)  | 0.05 | 0.08 |
| P21127     | CDK11B   | 92821  | 35  | 7 (1)  | 7 (1)  | 0.04 | 0.08 |
| Q9Y2E4     | DIP2C    | 172939 | 35  | 11 (1) | 10 (1) | 0.02 | 0.08 |
| Q13435     | SF3B2    | 100279 | 34  | 6 (1)  | 6 (1)  | 0.03 | 0.08 |
| Q15459     | SF3A1    | 88888  | 32  | 5 (1)  | 4 (1)  | 0.04 | 0.08 |
| Q13263     | TRIM28   | 90261  | 31  | 7 (1)  | 5 (1)  | 0.04 | 0.08 |
| P53985     | SLC16A1  | 54593  | 30  | 6 (1)  | 4 (1)  | 0.06 | 0.08 |
| P84098     | RPL19    | 23565  | 17  | 1 (0)  | 1 (0)  | 0.14 | 0.08 |
| P27708     | CAD      | 245167 | 130 | 31 (3) | 15 (3) | 0.05 | 0.07 |
| O75190     | DNAJB6   | 36122  | 74  | 4 (1)  | 3 (1)  | 0.09 | 0.07 |
| Q8TB72     | PUM2     | 114715 | 72  | 5 (1)  | 5 (1)  | 0.06 | 0.07 |
| Q9NXS2     | QPCTL    | 43068  | 57  | 6 (1)  | 4 (1)  | 0.08 | 0.07 |
| Q15029     | EFTUD2   | 110336 | 54  | 6 (2)  | 6 (2)  | 0.06 | 0.07 |
| Q53GQ0     | HSD17B12 | 34416  | 46  | 2 (2)  | 2 (2)  | 0.2  | 0.07 |



## Role of the IGF2BP3/ELAVL1 complex in colorectal cancer

|        |         |        |     |         |        |      |      |
|--------|---------|--------|-----|---------|--------|------|------|
| Q9Y4C8 | RBM19   | 107722 | 45  | 7 (1)   | 7 (1)  | 0.03 | 0.07 |
| Q06265 | EXOSC9  | 49545  | 44  | 3 (1)   | 3 (1)  | 0.07 | 0.07 |
| A0FGR8 | ESYT2   | 102807 | 43  | 7 (1)   | 6 (1)  | 0.03 | 0.07 |
| P78527 | PRKDC   | 473749 | 40  | 45 (1)  | 27 (1) | 0.01 | 0.07 |
| Q96RR1 | TWINK   | 77619  | 37  | 4 (1)   | 4 (1)  | 0.04 | 0.07 |
| O94906 | PRPF6   | 107656 | 34  | 11 (1)  | 6 (1)  | 0.03 | 0.07 |
| Q15434 | RBMS2   | 44159  | 33  | 3 (1)   | 2 (1)  | 0.07 | 0.07 |
| O76011 | KRT34   | 50818  | 32  | 7 (1)   | 3 (1)  | 0.06 | 0.07 |
| Q9NQT5 | EXOSC3  | 30010  | 32  | 2 (1)   | 2 (1)  | 0.11 | 0.07 |
| Q99755 | PIP5K1A | 63050  | 32  | 4 (1)   | 3 (1)  | 0.05 | 0.07 |
| Q5T4F7 | SFRP5   | 36508  | 26  | 3 (0)   | 2 (0)  | 0.09 | 0.07 |
| PODME0 | SETSIP  | 34861  | 22  | 3 (0)   | 2 (0)  | 0.1  | 0.07 |
| Q96QE5 | TEFM    | 41992  | 17  | 4 (0)   | 3 (0)  | 0.08 | 0.07 |
| Q9BRK4 | LZTS2   | 73399  | 14  | 6 (0)   | 5 (0)  | 0.04 | 0.07 |
| O43290 | SART1   | 90371  | 108 | 6 (2)   | 4 (1)  | 0.07 | 0.06 |
| Q8N9T8 | KRI1    | 83004  | 96  | 4 (3)   | 3 (2)  | 0.12 | 0.06 |
| Q6UN15 | FIP1L1  | 66601  | 83  | 3 (1)   | 3 (1)  | 0.05 | 0.06 |
| Q16769 | QPCT    | 40965  | 83  | 5 (2)   | 2 (2)  | 0.17 | 0.06 |
| Q86XZ4 | SPATS2  | 59850  | 81  | 108 (1) | 3 (1)  | 0.05 | 0.06 |
| Q96KR1 | ZFR     | 118079 | 77  | 8 (2)   | 5 (2)  | 0.06 | 0.06 |
| Q16563 | SYPL1   | 28889  | 77  | 3 (2)   | 2 (1)  | 0.12 | 0.06 |
| Q9NY93 | DDX56   | 62007  | 74  | 6 (1)   | 3 (1)  | 0.05 | 0.06 |
| Q66PJ3 | ARL6IP4 | 45287  | 68  | 2 (1)   | 2 (1)  | 0.07 | 0.06 |
| Q99590 | SCAF11  | 166319 | 54  | 8 (1)   | 8 (1)  | 0.02 | 0.06 |
| P14678 | SNRPB   | 24765  | 52  | 3 (2)   | 2 (1)  | 0.14 | 0.06 |
| Q15427 | SF3B4   | 44414  | 47  | 2 (1)   | 2 (1)  | 0.07 | 0.06 |
| A6NLU5 | VSTM2B  | 30393  | 42  | 3 (1)   | 1 (1)  | 0.11 | 0.06 |
| P16615 | ATP2A2  | 116336 | 42  | 9 (2)   | 7 (2)  | 0.06 | 0.06 |
| O14646 | CHD1    | 197707 | 38  | 17 (1)  | 8 (1)  | 0.02 | 0.06 |
| Q6PCB5 | RSBN1L  | 95381  | 36  | 5 (1)   | 4 (1)  | 0.03 | 0.06 |
| Q6PGP7 | TTC37   | 177485 | 35  | 14 (1)  | 10 (1) | 0.02 | 0.06 |
| Q96DI7 | SNRNP40 | 39742  | 35  | 2 (1)   | 2 (1)  | 0.08 | 0.06 |
| Q7Z739 | YTHDF3  | 63936  | 32  | 6 (1)   | 3 (1)  | 0.05 | 0.06 |
| Q9H7H0 | METTL17 | 51272  | 32  | 3 (1)   | 3 (1)  | 0.06 | 0.06 |
| Q9UNF1 | MAGED2  | 65085  | 31  | 8 (1)   | 6 (1)  | 0.1  | 0.06 |
| Q5C9Z4 | NOM1    | 96768  | 31  | 7 (1)   | 5 (1)  | 0.03 | 0.06 |
| Q8IVF7 | FMNL3   | 118051 | 29  | 13 (1)  | 7 (1)  | 0.03 | 0.06 |
| O75390 | CS      | 51908  | 28  | 13 (1)  | 3 (1)  | 0.06 | 0.06 |
| P27540 | ARNT    | 87380  | 27  | 4 (0)   | 3 (0)  | 0.04 | 0.06 |
| O00141 | SGK1    | 49196  | 23  | 3 (0)   | 3 (0)  | 0.07 | 0.06 |
| O75691 | UTP20   | 320805 | 22  | 34 (0)  | 17 (0) | 0.01 | 0.06 |
| Q9H4Z3 | PCIF1   | 81531  | 20  | 11 (0)  | 4 (0)  | 0.04 | 0.06 |
| A7E2Y1 | MYH7B   | 222392 | 20  | 18 (0)  | 11 (0) | 0.01 | 0.06 |
| O00567 | NOP56   | 66408  | 80  | 10 (2)  | 3 (1)  | 0.05 | 0.05 |
| Q8IY17 | PNPLA6  | 151383 | 62  | 22 (1)  | 6 (1)  | 0.02 | 0.05 |
| Q04637 | EIF4G1  | 176124 | 59  | 8 (1)   | 7 (1)  | 0.06 | 0.05 |
| Q15393 | SF3B3   | 136575 | 54  | 8 (1)   | 5 (1)  | 0.02 | 0.05 |
| Q9H0U3 | MAGT1   | 38411  | 52  | 3 (2)   | 2 (1)  | 0.09 | 0.05 |
| Q08J23 | NSUN2   | 87214  | 52  | 4 (1)   | 4 (1)  | 0.04 | 0.05 |

## Role of the IGF2BP3/ELAVL1 complex in colorectal cancer

|        |         |        |    |         |        |      |      |
|--------|---------|--------|----|---------|--------|------|------|
| Q6P4A7 | SFXN4   | 38259  | 43 | 2 (1)   | 2 (1)  | 0.09 | 0.05 |
| Q9Y5B6 | PAXBP1  | 105195 | 39 | 6 (1)   | 4 (1)  | 0.03 | 0.05 |
| Q5JTH9 | RRP12   | 145037 | 34 | 8 (1)   | 7 (1)  | 0.02 | 0.05 |
| P26599 | PTBP1   | 57357  | 28 | 3 (1)   | 2 (1)  | 0.06 | 0.05 |
| Q8WWM7 | ATXN2L  | 113589 | 28 | 5 (1)   | 5 (1)  | 0.06 | 0.05 |
| Q9H8Y5 | ANKZF1  | 81562  | 27 | 4 (0)   | 4 (0)  | 0.04 | 0.05 |
| Q01484 | ANK2    | 435957 | 25 | 29 (0)  | 16 (0) | 0.01 | 0.05 |
| P08567 | PLEK    | 40499  | 23 | 2 (0)   | 2 (0)  | 0.08 | 0.05 |
| P39060 | COL18A1 | 179389 | 59 | 7 (2)   | 5 (2)  | 0.04 | 0.04 |
| P21333 | FLNA    | 283301 | 36 | 12 (1)  | 10 (1) | 0.01 | 0.04 |
| Q5JSZ5 | PRRC2B  | 243958 | 34 | 7 (1)   | 7 (1)  | 0.01 | 0.04 |
| Q9UL40 | ZNF346  | 33539  | 33 | 1 (1)   | 1 (1)  | 0.1  | 0.04 |
| O75533 | SF3B1   | 146479 | 33 | 5 (1)   | 4 (1)  | 0.02 | 0.04 |
| P08195 | SLC3A2  | 68180  | 33 | 2 (1)   | 2 (1)  | 0.05 | 0.04 |
| O43837 | IDH3B   | 42442  | 30 | 1 (1)   | 1 (1)  | 0.08 | 0.04 |
| Q96CB9 | NSUN4   | 43631  | 29 | 113 (1) | 2 (1)  | 0.08 | 0.04 |
| P04844 | RPN2    | 69355  | 27 | 2 (1)   | 2 (1)  | 0.05 | 0.04 |
| Q96PV0 | SYNGAP1 | 149160 | 27 | 16 (1)  | 5 (1)  | 0.02 | 0.04 |
| O15427 | SLC16A3 | 50064  | 23 | 2 (0)   | 2 (0)  | 0.07 | 0.04 |
| Q6NTF9 | RHBDD2  | 39747  | 21 | 2 (1)   | 1 (1)  | 0.08 | 0.04 |
| Q9ULW3 | ABT1    | 31117  | 21 | 1 (0)   | 1 (0)  | 0.11 | 0.04 |
| P46019 | PHKA2   | 139404 | 19 | 9 (0)   | 5 (0)  | 0.02 | 0.04 |
| Q14596 | NBR1    | 108486 | 17 | 20 (0)  | 4 (0)  | 0.03 | 0.04 |
| Q6IQ23 | PLEKHA7 | 127626 | 17 | 3 (0)   | 3 (0)  | 0.03 | 0.04 |
| Q9Y520 | PRRC2C  | 317346 | 88 | 11 (5)  | 8 (4)  | 0.05 | 0.03 |
| Q13724 | MOGS    | 92032  | 60 | 7 (2)   | 3 (1)  | 0.04 | 0.03 |
| P49756 | RBM25   | 100467 | 54 | 2 (2)   | 2 (2)  | 0.07 | 0.03 |
| Q8NDV7 | TNRC6A  | 210967 | 40 | 5 (1)   | 5 (1)  | 0.02 | 0.03 |
| Q00610 | CLTC    | 193260 | 39 | 8 (1)   | 6 (1)  | 0.02 | 0.03 |
| Q07666 | KHDRBS1 | 48311  | 35 | 1 (1)   | 1 (1)  | 0.07 | 0.03 |
| P61619 | SEC61A1 | 52687  | 34 | 2 (1)   | 2 (1)  | 0.06 | 0.03 |
| Q9UK32 | RPS6KA6 | 84389  | 34 | 3 (1)   | 3 (1)  | 0.04 | 0.03 |
| Q8N556 | AFAP1   | 81530  | 33 | 14 (1)  | 3 (1)  | 0.04 | 0.03 |
| P22314 | UBA1    | 118858 | 31 | 5 (1)   | 4 (1)  | 0.03 | 0.03 |
| Q9UBD9 | CLCF1   | 25388  | 30 | 8 (1)   | 1 (1)  | 0.13 | 0.03 |
| Q9UER7 | DAXX    | 82064  | 25 | 2 (0)   | 2 (0)  | 0.04 | 0.03 |
| P14618 | PKM     | 58470  | 22 | 1 (0)   | 1 (0)  | 0.06 | 0.03 |
| Q15637 | SF1     | 68514  | 20 | 2 (0)   | 2 (0)  | 0.05 | 0.03 |
| O15230 | LAMA5   | 412023 | 48 | 21 (3)  | 6 (1)  | 0.01 | 0.02 |
| P83105 | HTRA4   | 51973  | 29 | 9 (1)   | 2 (1)  | 0.06 | 0.02 |
| Q16531 | DDB1    | 128142 | 27 | 2 (1)   | 2 (1)  | 0.03 | 0.02 |
| Q96SZ4 | ZSCAN10 | 82503  | 27 | 4 (0)   | 2 (0)  | 0.04 | 0.02 |
| Q08345 | DDR1    | 102032 | 22 | 2 (0)   | 2 (0)  | 0.03 | 0.02 |
| Q5BKZ1 | ZNF326  | 65955  | 19 | 1 (0)   | 1 (0)  | 0.05 | 0.02 |
| Q8NB91 | FANCB   | 99431  | 17 | 2 (0)   | 2 (0)  | 0.03 | 0.02 |
| Q8TE68 | EPS8L1  | 80487  | 36 | 9 (2)   | 2 (1)  | 0.04 | 0.01 |
| Q96EK5 | KIF1BP  | 72453  | 34 | 2 (1)   | 1 (1)  | 0.05 | 0.01 |

## Role of the IGF2BP3/ELAVL1 complex in colorectal cancer

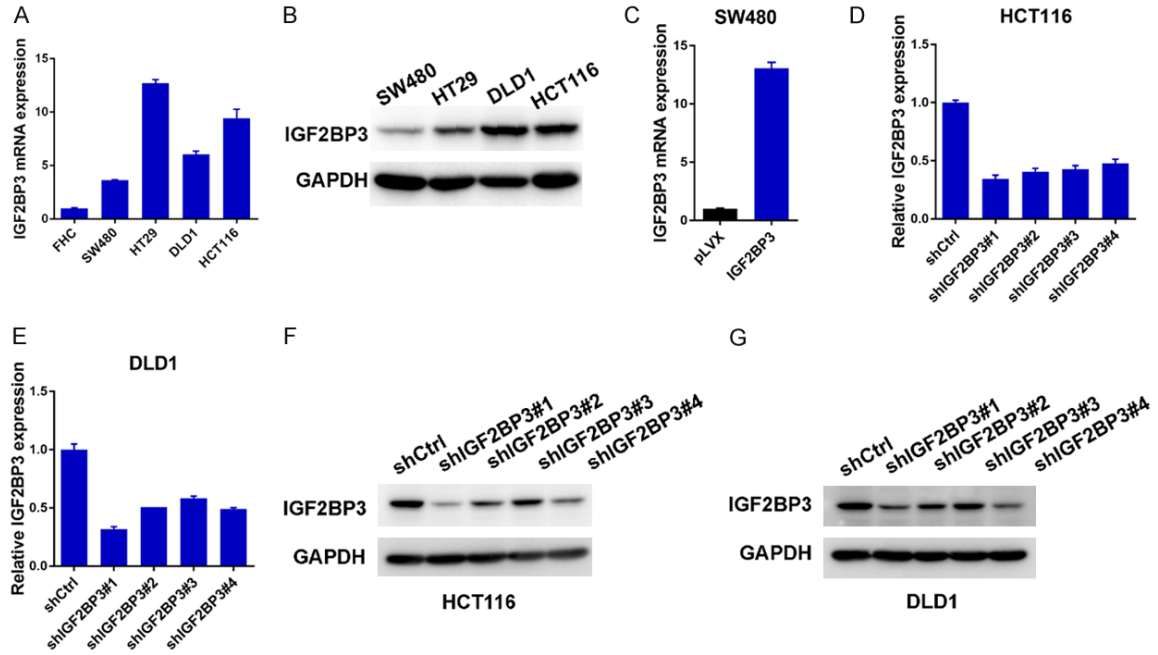

**Figure S1.** Analysis of IGF2BP3 expression in the indicated CRC cells. (A) RT-qPCR analysis was performed to examine the mRNA expression of *IGF2BP3* in the normal colon FHC cell line and CRC cell lines. (B) The expression of IGF2BP3 was analyzed by western blotting in CRC cells. (C) The expression of *IGF2BP3* was analyzed with RT-qPCR in the stable IGF2BP3-overexpressing SW480 cells and the control cells. (D, E) RT-qPCR analysis was performed to examine the mRNA expression of *IGF2BP3* in the HCT116 (D) and DLD1 (E) cells with stable IGF2BP3 depletion. (F, G) Western blotting was performed to analyze the expression of IGF2BP3 in the HCT116 (F) or DLD1 (G) cells with stable IGF2BP3 depletion.

## Role of the IGF2BP3/ELAVL1 complex in colorectal cancer

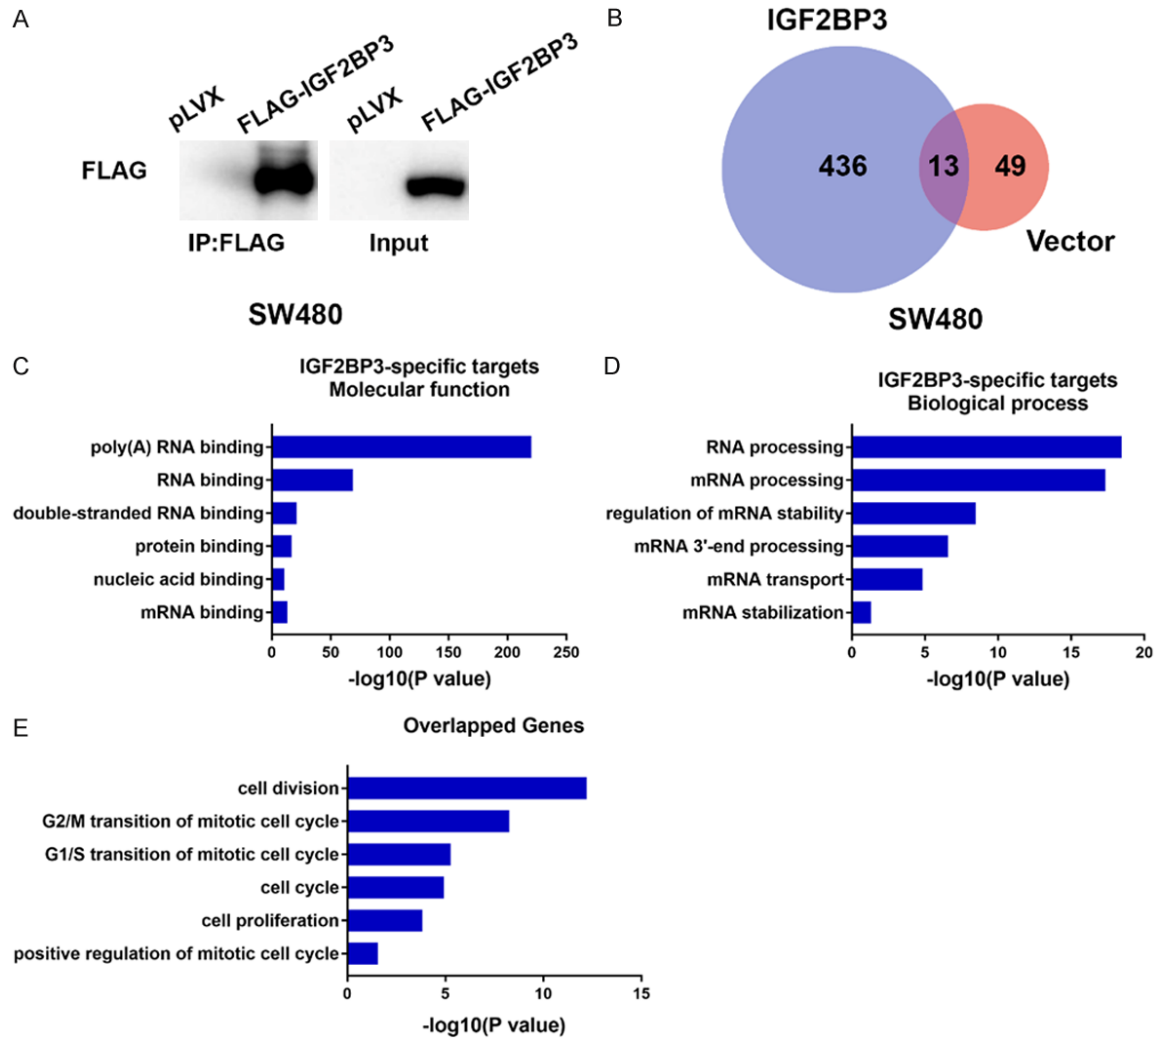

**Figure S2.** Bioinformatics analysis of IGF2BP3-interacted proteins and co-regulated mRNAs. (A) Whole-cell lysates from the stable FLAG-IGF2BP3-overexpressing SW480 cells and control cells were subjected to co-IP analysis with an anti-FLAG M2 affinity gel. The immunoprecipitates were then blotted using antibodies against the indicated proteins. (B) Venn diagram analysis of the interacting proteins in the FLAG-IGF2BP3-overexpressing SW480 cells and control cells according to mass spectrum assay. (C, D) GO analysis of the IGF2BP3-specific interacting proteins in SW480 cells. (E) GO analysis of the overlapping genes that were coregulated by IGF2BP3 and ELAVL1.

## Role of the IGF2BP3/ELAVL1 complex in colorectal cancer

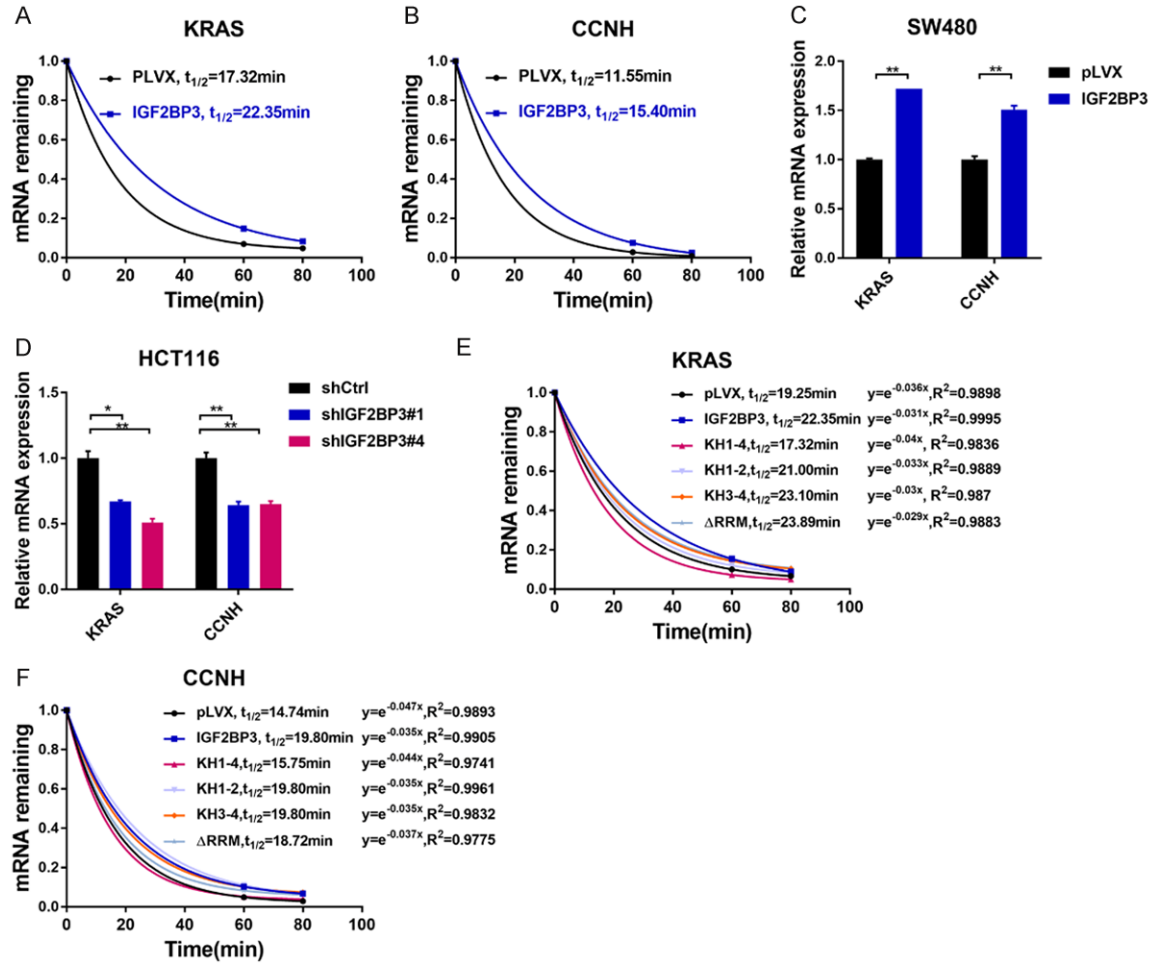

**Figure S3.** Regulation of mRNA stability by IGF2BP3. (A, B) Both the IGF2BP3-overexpressing SW480 cells and control cells were treated with actinomycin D for 60 and 80 min respectively. Total RNA was extracted, the relative expression of *KRAS* (A) and *CCNH* (B) was calculated, and the mRNA half-lives of these genes were analyzed. (C) The mRNA expression of *KRAS* and *CCNH* was analyzed in the IGF2BP3-overexpressing SW480 cells and control cells. (D) The mRNA expression of *KRAS* and *CCNH* was analyzed in the IGF2BP3-deficient HCT116 cells and control cells. (E, F) The indicated IGF2BP3 deletion mutants and IGF2BP3 (WT) were stably overexpressed in SW480 cells. Cells were treated with actinomycin D for 60 and 80 min respectively. Total RNA was extracted, the relative expression of *KRAS* (E) and *CCNH* (F) was calculated, and the mRNA half-lives of these genes were analyzed. \* $P < 0.05$ , \*\* $P < 0.01$ .

## Role of the IGF2BP3/ELAVL1 complex in colorectal cancer

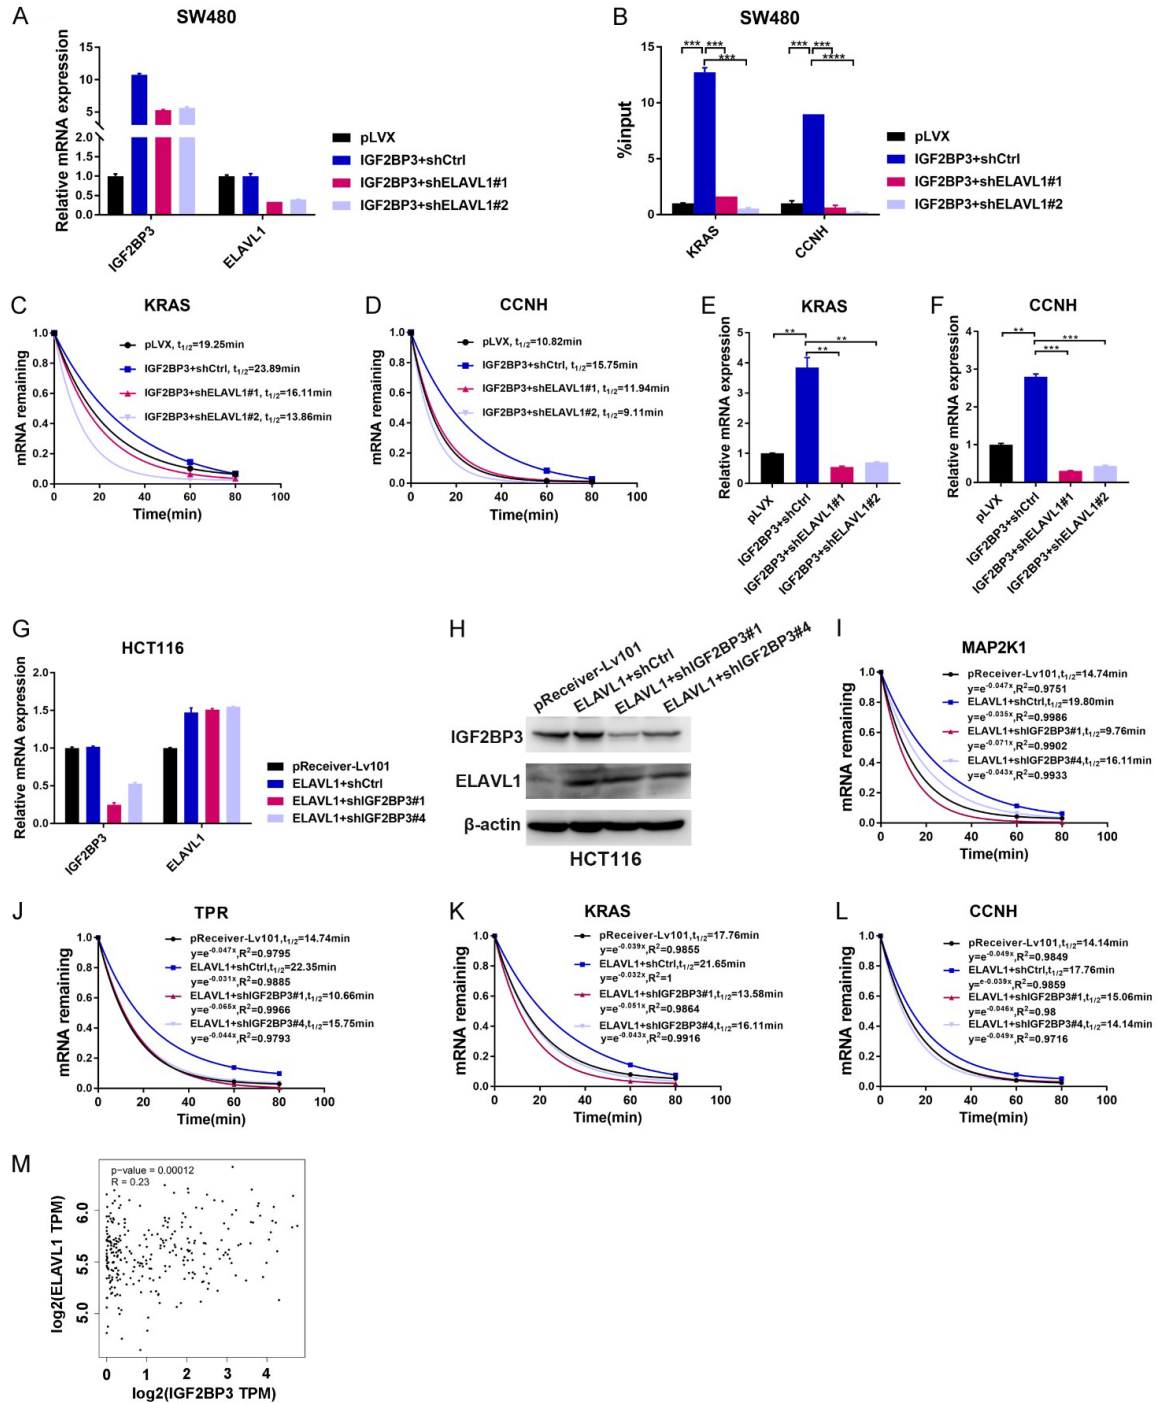

**Figure S4.** IGF2BP3 cooperates with ELAVL1 to regulate mRNA stability. (A) The expression of ELAVL1 was depleted in IGF2BP3-overexpressing SW480 cells. RT-qPCR analysis was performed to detect the expression of *IGF2BP3* and *ELAVL1*. (B) RIP analysis was performed to analyze the IGF2BP3 binding to the regulatory regions of the *KRAS* and *CCNH* mRNA in the SW480 cells overexpressing IGF2BP3 and these cells with the additional stable depletion of ELAVL1. (C, D) Both the IGF2BP3-overexpressing SW480 cells and these cells with the additional stable depletion of ELAVL1 were treated with actinomycin D for 60 and 80 min respectively. Total RNAs were extracted, the relative expression of *KRAS* (C) and *CCNH* (D) was calculated, and the mRNA half-lives of these genes were analyzed. (E, F) RT-qPCR assay was performed to evaluate the mRNA expression of *KRAS* (E), and *CCNH* (F) in the IGF2BP3-overexpressing SW480 cells and these cells with the additional stable ELAVL1 depletion. (G) The expression of IGF2BP3 was depleted in ELAVL1-overexpressing HCT116 cells. RT-qPCR analysis was performed to detect the expression of *IGF2BP3* and *ELAVL1*. (H) Western blot analysis was performed to detect the expression of IGF2BP3 and ELAVL1

## Role of the IGF2BP3/ELAVL1 complex in colorectal cancer

in ELAVL1-overexpressing HCT116 cells and these cells with additional stable depletion of IGF2BP3. (I-L) Both the ELAVL1-overexpressing HCT116 cells and these cells with additional stable depletion of IGF2BP3 were treated with actinomycin D for 60 and 80 min respectively. Total RNA was extracted, and the mRNA half-lives of *MAP2K1* (I), *TPR* (J), *KRAS* (K), *CCNH* (L) were analyzed. (M) Analysis of the clinical correlations between *IGF2BP3* and *ELAVL1* expression with the GEPIA database [1]. \* $P < 0.05$ , \*\* $P < 0.01$ , \*\*\* $P < 0.001$ , \*\*\*\* $P < 0.0001$ .

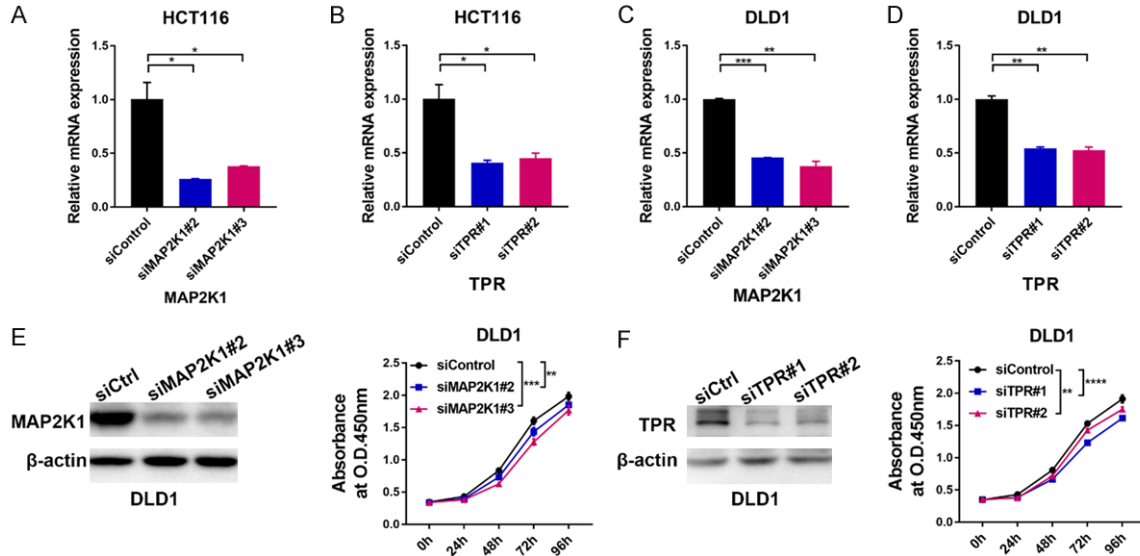

**Figure S5.** Knockdown of *MAP2K1* or *TPR* suppresses the proliferation of DLD1 cells. (A, B) The mRNA expression of *MAP2K1* and *TPR* was analyzed in the HCT116 cells transfected with siRNA targeting *MAP2K1* (A) or *TPR* (B) and nontargeting control siRNA. (C, D) The mRNA expression of *MAP2K1* and *TPR* was analyzed in the DLD1 cells transfected with siRNA targeting *MAP2K1* (C) or *TPR* (D) and nontargeting control siRNA. (E, F) DLD1 cells were transfected with siRNA targeting *MAP2K1* or *TPR* and nontargeting siRNA control, and the knockdown efficiency of *MAP2K1* (E, left panel) and *TPR* (F, left panel) was confirmed with western blotting analysis. The effect of *MAP2K1* and *TPR* silencing on the proliferation of DLD1 cells was analyzed with a CCK-8 assay (E, F right panel). \* $P < 0.05$ , \*\* $P < 0.01$ , \*\*\* $P < 0.001$ , \*\*\*\* $P < 0.0001$ .

## Role of the IGF2BP3/ELAVL1 complex in colorectal cancer

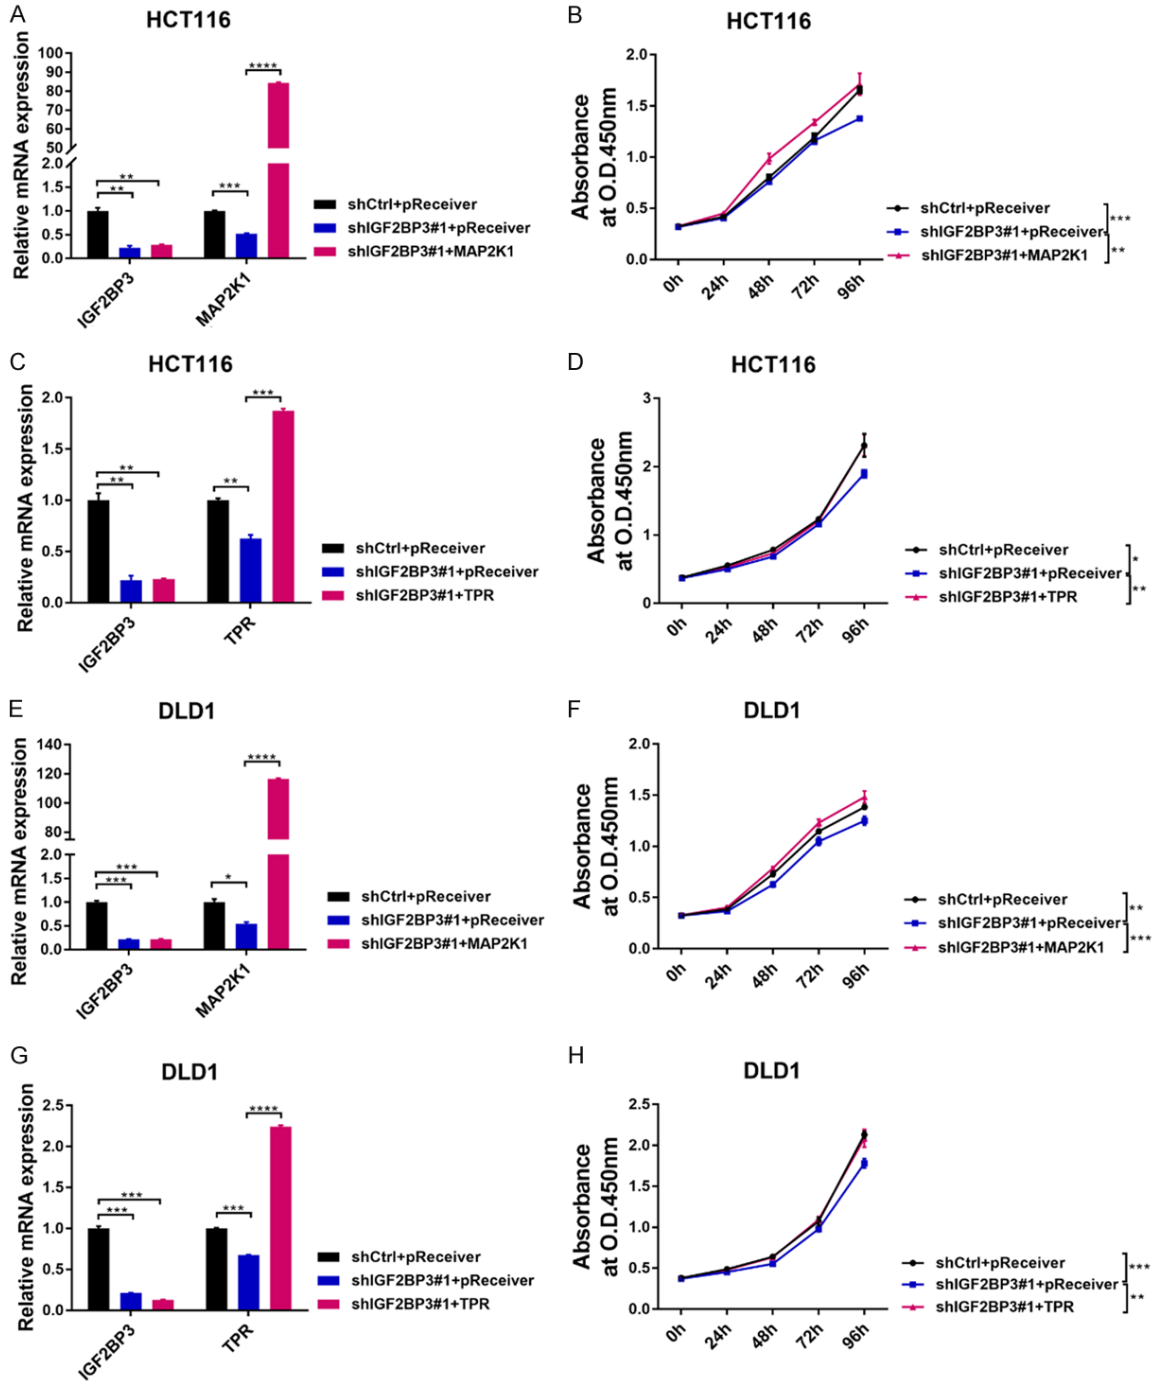

**Figure S6.** Ectopic expression of MAP2K1 or TPR rescues the proliferation of IGF2BP3-depleted HCT116 and DLD1 cells. (A-D) The IGF2BP3-depleted HCT116 cells were further overexpressed with MAP2K1 (A) and TPR (C). The expression of *IGF2BP3*, *MAP2K1* and *TPR* was analyzed with RT-qPCR analysis. The proliferation of the indicated cell was examined with a CCK-8 assay (B, D). (E-H) The IGF2BP3-depleted DLD1 cells were further overexpressed with MAP2K1 (E) and TPR (G). The expression of *IGF2BP3*, *MAP2K1* and *TPR* was analyzed with RT-qPCR analysis. The proliferation of the indicated cell was examined with a CCK-8 assay (F, H). \* $P < 0.05$ , \*\* $P < 0.01$ , \*\*\* $P < 0.001$ , \*\*\*\* $P < 0.0001$ .
